# Supplementary material for: Effects of Traditional Chinese Medicine on Chemotherapy-Induced Myelosuppression and Febrile Neutropenia in Breast Cancer Patients
Source: Hindawi journal article supplement (doi:10.1155/2015/736197), 2015-01-01
Supplement: f1 [file 736197.f1.pdf]

**Supporting Table 1 Subgroups of Chemotherapy Regimens with Different Outcomes In Chemotherapy-Induced Leukopenia Between Two Groups**

| Outcomes                       | Before Propensity Matching |               |          | After Propensity Matching |               |          |
|--------------------------------|----------------------------|---------------|----------|---------------------------|---------------|----------|
|                                | Group1<br>(n)              | Group2<br>(n) | P        | Group1<br>(n)             | Group2<br>(n) | P        |
| <b>Chemotherapy regimens 1</b> |                            |               |          |                           |               |          |
| Mild                           | 121                        | 10            | <0.0001  | 142                       | 58            | <0.0001  |
| Severe                         | 33                         | 25            |          | 37                        | 115           |          |
| <b>Chemotherapy regimens 2</b> |                            |               |          |                           |               |          |
| Mild                           | 35                         | 22            | 0.000025 | 54                        | 24            | 0.000006 |
| Severe                         | 7                          | 32            |          | 9                         | 28            |          |
| <b>Chemotherapy regimens 3</b> |                            |               |          |                           |               |          |
| Mild                           | 52                         | 25            | 0.000153 | 65                        | 56            | 0.080    |
| Severe                         | 120                        | 158           |          | 164                       | 204           |          |
| <b>Chemotherapy regimens 4</b> |                            |               |          |                           |               |          |
| Mild                           | 53                         | 28            | 0.000074 | 67                        | 31            | 0.000034 |
| Severe                         | 32                         | 59            |          | 39                        | 61            |          |

**Mild:** Grade I and II myelosuppression. **Severe:** Grade III and IV myelosuppression. **Chemotherapy:**

- 1 The chemotherapy contains AC/EC (Adriamycin or Epirubicin, Cyclophosphamide), CAF/CEF (Adriamycin or Epirubicin, Cyclophosphamide, 5-Fluorouracil).
- 2 The chemotherapy contains TC (Paclitaxel or Docetaxel, Cyclophosphamide), T (Paclitaxel or Docetaxel).
- 3 The chemotherapy contains anthracyclines combined with paclitaxel or docetaxel: TAC/TEC (Paclitaxel or Docetaxel, Cyclophosphamide, Adriamycin or Epirubicin); TA/TE (Paclitaxel or Docetaxel, Adriamycin or Epirubicin).
- 4 The chemotherapy contains anthracyclines followed by paclitaxel or docetaxel: AC/EC (Adriamycin or Epirubicin, Cyclophosphamide), CAF/CEF (Adriamycin or Epirubicin, Cyclophosphamide, 5-Fluorouracil), followed with T or TH (Paclitaxel or Docetaxel, herceptin).

**Supporting Table 2 Subgroups of Chemotherapy Regimens with Different Outcomes In Chemotherapy-Induced Neutropenia Between Two Groups**

| Outcomes                       | Before Propensity Matching |               |              | After Propensity Matching |               |                 |
|--------------------------------|----------------------------|---------------|--------------|---------------------------|---------------|-----------------|
|                                | Group1<br>(n)              | Group2<br>(n) | P            | Group1<br>(n)             | Group2<br>(n) | P               |
| <b>Chemotherapy regimens 1</b> |                            |               |              |                           |               |                 |
| Mild                           | 61                         | 11            | 0.368        | 72                        | 59            | 0.235           |
| Severe                         | 93                         | 24            |              | 107                       | 114           |                 |
| <b>Chemotherapy regimens 2</b> |                            |               |              |                           |               |                 |
| Mild                           | 27                         | 17            | <b>0.001</b> | 44                        | 15            | <b>0.000012</b> |
| Severe                         | 15                         | 37            |              | 19                        | 37            |                 |
| <b>Chemotherapy regimens 3</b> |                            |               |              |                           |               |                 |
| Mild                           | 21                         | 18            | 0.475        | 26                        | 26            | 0.628           |
| Severe                         | 151                        | 165           |              | 203                       | 234           |                 |
| <b>Chemotherapy regimens 4</b> |                            |               |              |                           |               |                 |
| Mild                           | 17                         | 18            | 0.911        | 21                        | 22            | 0.485           |
| Severe                         | 68                         | 69            |              | 85                        | 70            |                 |

**Mild:** Grade I and II myelosuppression. **Severe:** Grade III and IV myelosuppression. **Chemotherapy:**

- 1 The chemotherapy contains AC/EC (Adriamycin or Epirubicin, Cyclophosphamide), CAF/CEF(Adriamycin or Epirubicin, Cyclophosphamide, 5-Fluorouracil).
- 2 The chemotherapy contains TC (Paclitaxel or Docetaxel, Cyclophosphamide), T (Paclitaxel or Docetaxel).
- 3 The chemotherapy contains anthracyclines combined with paclitaxel or docetaxel: TAC/TEC (Paclitaxel or Docetaxel, Cyclophosphamide, Adriamycin or Epirubicin); TA/TE (Paclitaxel or Docetaxel , Adriamycin or Epirubicin).
- 4 The chemotherapy contains anthracyclines followed by paclitaxel or docetaxel: AC/EC (Adriamycin or Epirubicin, Cyclophosphamide), CAF/CEF (Adriamycin or Epirubicin, Cyclophosphamide, 5-Fluorouracil), followed with T or TH(Paclitaxel or Docetaxel, herceptin).

**Supporting Table 3 Subgroups of Chemotherapy Regimens with Different Outcomes In Chemotherapy-Induced FN Between Two Groups**

| Outcomes                       | Before Propensity Matching |               |                   | After Propensity Matching |               |                   |
|--------------------------------|----------------------------|---------------|-------------------|---------------------------|---------------|-------------------|
|                                | Group1<br>(n)              | Group2<br>(n) | P                 | Group1<br>(n)             | Group2<br>(n) | P                 |
| <b>Chemotherapy regimens 1</b> |                            |               |                   |                           |               |                   |
| Mild                           | 153                        | 30            | <b>0.000295</b>   | 178                       | 144           | <b>&lt;0.0001</b> |
| Severe                         | 1                          | 5             |                   | 1                         | 29            |                   |
| <b>Chemotherapy regimens 2</b> |                            |               |                   |                           |               |                   |
| Mild                           | 42                         | 45            | <b>0.004</b>      | 63                        | 45            | <b>0.003053</b>   |
| Severe                         | 0                          | 9             |                   | 0                         | 7             |                   |
| <b>Chemotherapy regimens 3</b> |                            |               |                   |                           |               |                   |
| Mild                           | 150                        | 110           | <b>&lt;0.0001</b> | 200                       | 179           | <b>0.000001</b>   |
| Severe                         | 22                         | 73            |                   | 29                        | 81            |                   |
| <b>Chemotherapy regimens 4</b> |                            |               |                   |                           |               |                   |
| Mild                           | 83                         | 69            | <b>0.000176</b>   | 104                       | 71            | <b>&lt;0.0001</b> |
| Severe                         | 2                          | 18            |                   | 2                         | 21            |                   |

**Mild:** Grade I and II myelosuppression. **Severe:** Grade III and IV myelosuppression. **Chemotherapy:**

- 1 The chemotherapy contains AC/EC (Adriamycin or Epirubicin, Cyclophosphamide), CAF/CEF (Adriamycin or Epirubicin, Cyclophosphamide, 5-Fluorouracil).
- 2 The chemotherapy contains TC (Paclitaxel or Docetaxel, Cyclophosphamide), T (Paclitaxel or Docetaxel).
- 3 The chemotherapy contains anthracyclines combined with paclitaxel or docetaxel: TAC/TEC (Paclitaxel or Docetaxel, Cyclophosphamide, Adriamycin or Epirubicin); TA/TE (Paclitaxel or Docetaxel, Adriamycin or Epirubicin).
- 4 The chemotherapy contains anthracyclines followed by paclitaxel or docetaxel: AC/EC (Adriamycin or Epirubicin, Cyclophosphamide), CAF/CEF (Adriamycin or Epirubicin, Cyclophosphamide, 5-Fluorouracil), followed with T or TH (Paclitaxel or Docetaxel, herceptin).

**Supporting Table 4 Subgroups of Tumor Stage with Different Outcomes In  
Chemotherapy-Induced Leukopenia Between Two Groups**

| Outcomes                    | Before Propensity Matching |               |                   | After Propensity Matching |               |                   |
|-----------------------------|----------------------------|---------------|-------------------|---------------------------|---------------|-------------------|
|                             | Group1<br>(n)              | Group2<br>(n) | P                 | Group1<br>(n)             | Group2<br>(n) | P                 |
| <b>TNM stage I</b>          |                            |               |                   |                           |               |                   |
| Mild                        | 108                        | 44            | <b>0.000003</b>   | 141                       | 63            | <b>&lt;0.0001</b> |
| Severe                      | 56                         | 73            |                   | 74                        | 101           |                   |
| <b>TNM stage II</b>         |                            |               |                   |                           |               |                   |
| Mild                        | 136                        | 32            | <b>&lt;0.0001</b> | 169                       | 83            | <b>&lt;0.0001</b> |
| Severe                      | 83                         | 157           |                   | 106                       | 250           |                   |
| <b>TNM stage III&amp;IV</b> |                            |               |                   |                           |               |                   |
| Mild                        | 17                         | 9             | 0.326             | 18                        | 23            | 0.227             |
| Severe                      | 53                         | 44            |                   | 69                        | 57            |                   |

**Mild:** Grade I and II myelosuppression. **Severe:** Grade III and IV myelosuppression.

**Supporting Table 5 Subgroups of Tumor Stage with Different Outcomes In  
Chemotherapy-Induced Neutropenia Between Two Groups**

| Outcomes                    | Before Propensity Matching |               |                 | After Propensity Matching |               |                 |
|-----------------------------|----------------------------|---------------|-----------------|---------------------------|---------------|-----------------|
|                             | Group1<br>(n)              | Group2<br>(n) | P               | Group1<br>(n)             | Group2<br>(n) | P               |
| <b>TNM stage I</b>          |                            |               |                 |                           |               |                 |
| Mild                        | 55                         | 33            | 0.342           | 76                        | 53            | 0.537           |
| Severe                      | 109                        | 84            |                 | 139                       | 111           |                 |
| <b>TNM stage II</b>         |                            |               |                 |                           |               |                 |
| Mild                        | 66                         | 24            | <b>0.000023</b> | 81                        | 54            | <b>0.000093</b> |
| Severe                      | 153                        | 165           |                 | 194                       | 279           |                 |
| <b>TNM stage III&amp;IV</b> |                            |               |                 |                           |               |                 |
| Mild                        | 5                          | 7             | 0.262           | 6                         | 15            | 0.021           |
| Severe                      | 65                         | 46            |                 | 81                        | 65            |                 |

**Mild:** Grade I and II myelosuppression. **Severe:** Grade III and IV myelosuppression.

**Supporting Table 6 Subgroups of Tumor Stage with  
Different Outcomes In Chemotherapy-Induced FN Between Two Groups**

| Outcomes                    | Before Propensity Matching |               |                   | After Propensity Matching |               |                   |
|-----------------------------|----------------------------|---------------|-------------------|---------------------------|---------------|-------------------|
|                             | Group1<br>(n)              | Group2<br>(n) | P                 | Group1<br>(n)             | Group2<br>(n) | P                 |
| <b>TNM stage I</b>          |                            |               |                   |                           |               |                   |
| Mild                        | 154                        | 90            | <b>0.000033</b>   | 199                       | 130           | <b>0.000152</b>   |
| Severe                      | 10                         | 27            |                   | 16                        | 34            |                   |
| <b>TNM stage II</b>         |                            |               |                   |                           |               |                   |
| Mild                        | 212                        | 127           | <b>&lt;0.0001</b> | 268                       | 246           | <b>&lt;0.0001</b> |
| Severe                      | 7                          | 62            |                   | 7                         | 87            |                   |
| <b>TNM stage III&amp;IV</b> |                            |               |                   |                           |               |                   |
| Mild                        | 62                         | 37            | <b>0.009</b>      | 78                        | 63            | 0.052             |
| Severe                      | 8                          | 16            |                   | 9                         | 17            |                   |

**Mild:** Grade I and II myelosuppression. **Severe:** Grade III and IV myelosuppression.

**Supporting Table 7 The Toxicity of TCM**

| Variables                  | Before Propensity Matching |                   |                   | After Propensity Matching |                   |                   |
|----------------------------|----------------------------|-------------------|-------------------|---------------------------|-------------------|-------------------|
|                            | Group1<br>(n=453)          | Group2<br>(n=359) | P                 | Group1<br>(n=577)         | Group2<br>(n=577) | P                 |
| <b>Renal damage</b>        |                            |                   |                   |                           |                   |                   |
| <b>BUN (mmol /L)</b>       |                            |                   |                   |                           |                   |                   |
| 2.14-7.14                  | 453                        | 359               |                   | 577                       | 577               |                   |
| > 7.14                     | 0                          | 0                 |                   | 0                         | 0                 |                   |
| <b>CR (umol /L)</b>        |                            |                   |                   |                           |                   |                   |
| 45-84                      | 453                        | 359               |                   | 577                       | 577               |                   |
| > 84                       | 0                          | 0                 |                   | 0                         | 0                 |                   |
| <b>Hepatic dysfunction</b> |                            |                   |                   |                           |                   |                   |
| <b>ALT (IU/L)</b>          |                            |                   |                   |                           |                   |                   |
| ≤40                        | 382                        | 257               | <b>0.000842</b>   | 487                       | 446               | <b>0.004167</b>   |
| >40                        | 71                         | 102               |                   | 90                        | 131               |                   |
| <b>AST (IU/L)</b>          |                            |                   |                   |                           |                   |                   |
| ≤40                        | 394                        | 281               | <b>&lt;0.0001</b> | 499                       | 483               | <b>&lt;0.0001</b> |
| >40                        | 59                         | 78                |                   | 78                        | 94                |                   |

ALT, alanine aminotransferase; AST, aspartase transferase. BUN, blood urea nitrogen creatinine; CR, creatinine.
